# Supplementary material
Source: Springer Nature journal article supplement (https://www.springermedizin.de/resource/supplementary/12885_2008_1401_MOESM6_ESM.pdf/9473034)

$\beta$ -Actin

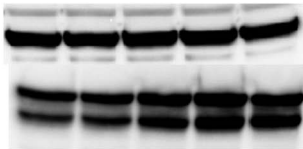

JNK

$\beta$ -Actin

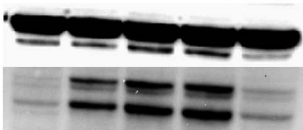

p-JNK

$\beta$ -Actin

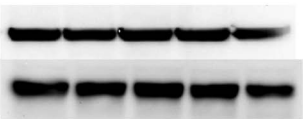

MKK3

$\beta$ -Actin

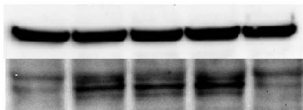

MKK3/6

VT-1

0 0.1 1 5 5

PPMP

- - - - +

Supplement: MOESM6 [file 9473034]
